# Supplementary material for: SOCS1 regulates hepatic regenerative response and provides prognostic makers for acute obstructive cholangitis
Source: PubMed Central journal article supplement (PMC5573403; doi:10.1038/s41598-017-09865-z), 2017-08-25

# SOCS1 regulates hepatic regenerative response and provides prognostic makers for acute obstructive cholangitis

Jianhua Yu<sup>a</sup>, Weiguang Zhang<sup>b</sup>, Hongwei Qian<sup>a</sup>, Haijun Tang<sup>a</sup>, Weiguo Lin<sup>a</sup>,  
Baochun Lu<sup>a#</sup>.

<sup>a</sup>Department of Hepatobiliary Surgery, Shaoxing People's Hospital, Shaoxing Hospital of Zhejiang University, Shaoxing, China

<sup>b</sup>Department of Molecular Medicine and Clinical Laboratory, Shaoxing Second Hospital, Shaoxing, China

<sup>#</sup>Correspondence to Baochun Lu [sygd\_lbc@126.com].

## Supplementary information

Figure 1

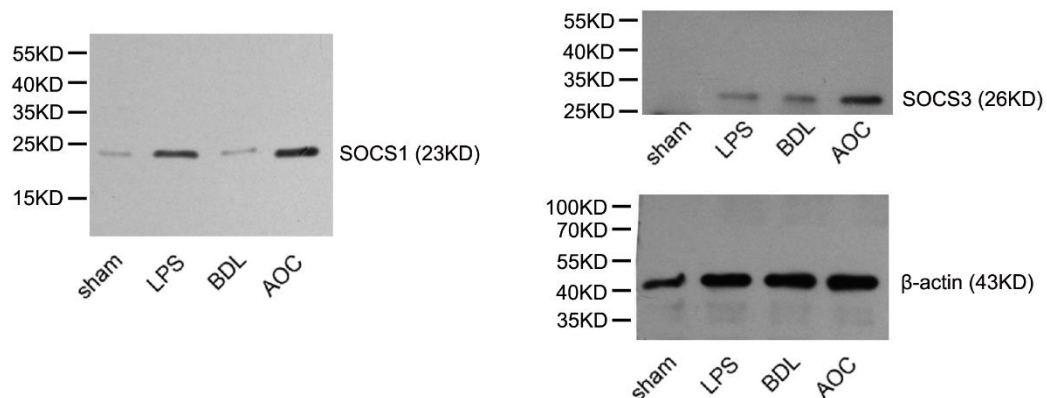

Figure 2

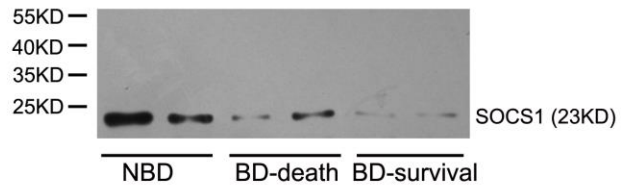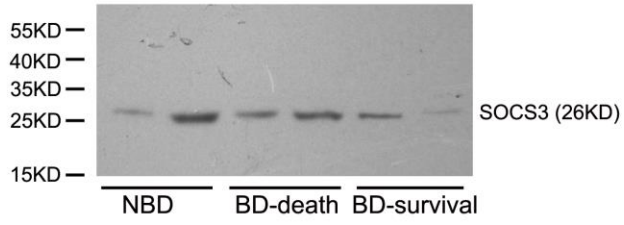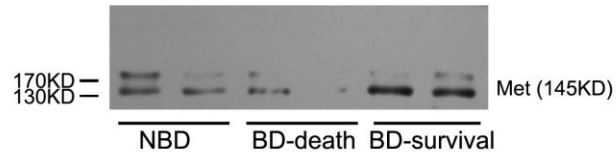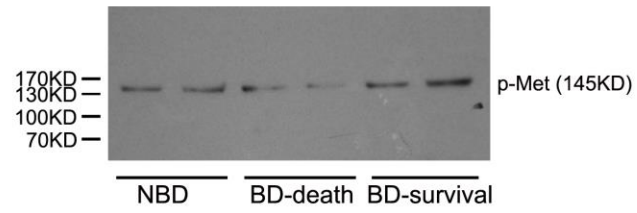

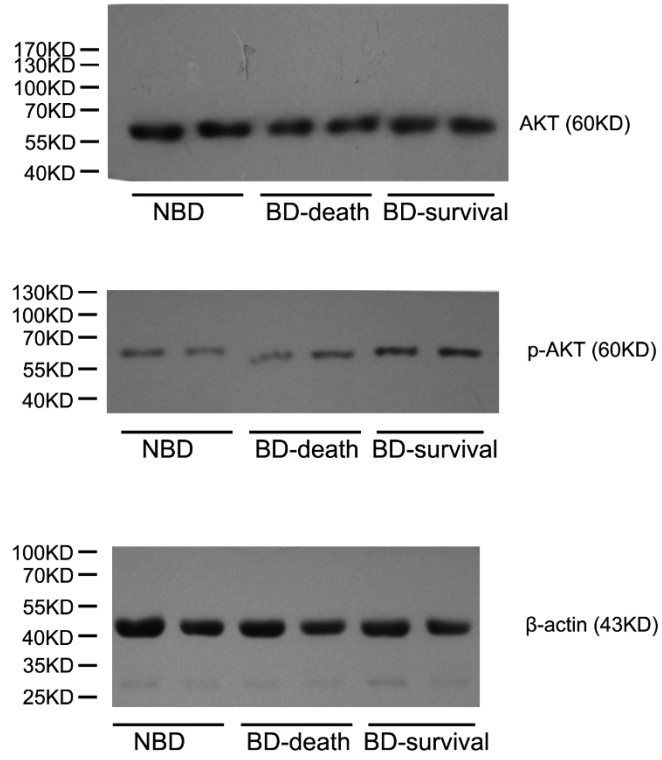

Figure 3

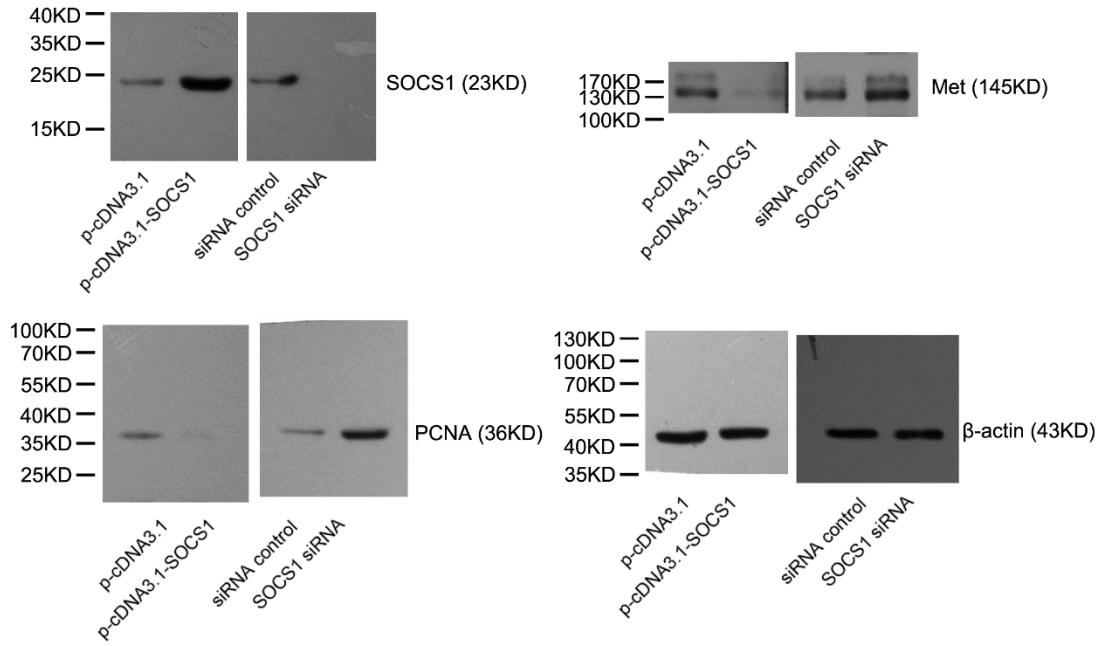

Figure 4

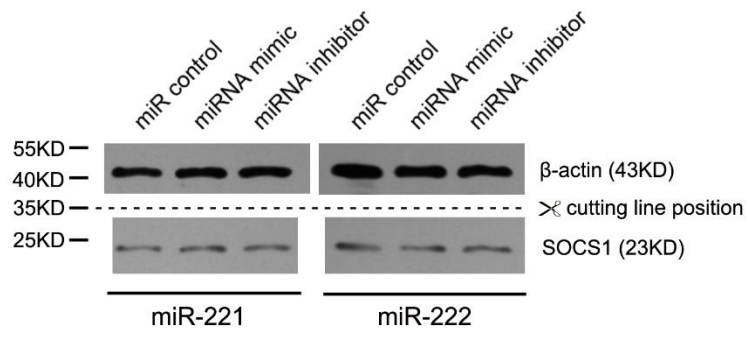

Supplement: 41598_2017_9865_MOESM1_ESM.pdf [file 41598_2017_9865_MOESM1_ESM.pdf]
